# Supplementary material for: The Importance of Socioeconomic Status as a Modulator of the Bilingual Advantage in Cognitive Ability
Source: Front Psychol. 2018 Sep 26;9:1818. doi: 10.3389/fpsyg.2018.01818 (PMC6168657; doi:10.3389/fpsyg.2018.01818)
Supplement: Supplementary file 1 [file Table_1.XLSX]

## Sheet: Data
Participant	SEX (0 = male,1 = female)	AGE	SES (0 = low, 1 = high)	Language group (0 = ML, 1 = BL)	RAVENS (max = 12)	DigitSpan_FW	DigitSpan_BW	SIMON_RT_CONG	SIMON_RT_INCNG	SIMON_ACC_CONGR	SIMON_ACC_INCONG	TOL_ACC	TOL_RT_FIRSTMOVE	TOL_RT_TOTAL
1	0	28.5833	0	0	9	10	6	499.17	497.71	1	0.94	0.5	13331.7	20379.3
2	0	24.4167	0	0	8	7	5	611.93	551	0.83	0.89	0.75	18149.2	25264
3	0	20.9167	0	0	4	6	4	426.65	507.87	0.94	0.83	0.166667	28069.5	32411.5
4	0	21	0	0	4	12	5	445.72	525.24	1	0.94	0.666667	15129.4	22239.9
5	0	28.4167	0	0	9	10	9	593.5	620	1	1	0.583333	9710.43	18519.6
6	1	29.8333	0	0	6	9	4	431.35	438.24	0.94	0.94	0.75	15192	26830.7
7	1	26.5	0	0	3	5	6	609.24	742.53	0.94	0.83	0.25	18722.3	35830.3
8	0	24	0	0	5	6	5	548.67	595.72	1	1	0.5	18993.7	41103
9	0	25.4167	0	0	4	6	2	600.36	545	0.78	0.06	0.416667	16285.6	29570
10	0	24.5	0	0	9	9	6	428.53	449.5	0.94	1	0.75	16102.9	25652.9
11	0	29.1667	0	0	5	13	9	377.44	440.17	1	1	0.833333	21697.3	26815.7
12	1	21.5833	0	0	5	8	6	684.39	754.86	1	0.78	0.833333	12121.2	23245.8
13	1	28.4167	0	0	6	9	6	656.12	696.72	0.94	1	0.583333	9047.14	16867.3
14	1	29.5833	0	0	5	9	7	656.27	720.6	0.83	0.83	0.833333	11936.8	20243.4
15	1	19.5833	0	0	7	10	6	597.78	646.76	1	0.94	0.666667	14330.8	24099.5
16	1	23.5	0	0	5	8	7	482.39	555.94	1	0.89	0.5	18157.3	25664.8
17	1	23	0	0	5	6	5	734.19	758.31	0.89	0.72	0.75	10240.3	24613.9
18	1	20.5	0	0	5	7	7	634.39	699.43	1	0.78	0.916667	24281.2	37020
19	1	20.9167	0	0	7	9	8	595.22	712.8	1	0.83	0.833333	14859.1	26605.1
20	0	23.6667	0	0	4	6	7	634	681.15	0.94	0.72	0.666667	14407.9	26188.4
46	0	24.0833	0	1	9	6	5	365.28	404.6	1	0.83	0.416667	14000.8	18956.8
47	0	23.9167	0	1	6	6	3	642.38	576.44	0.89	1	0.166667	26059.5	41464.5
48	1	20.8333	0	1	2	8	2	490	517.72	1	1	0.416667	10491.6	19151
49	1	23	0	1	8	8	6	513.61	536.93	1	0.83	0.416667	5954.6	11592.4
50	1	23.0833	0	1	6	5	4	496.11	532.25	1	0.89	0.5	11472.5	19612.7
51	1	26.8333	0	1	3	6	3	535.13	634.88	0.83	0.89	0.0833333	90283	96933
52	0	26.0833	0	1	10	11	7	506.67	512.29	1	0.94	0.583333	38154	48178.6
53	0	23.25	0	1	2	6	4	496.94	597.44	1	0.89	0.0833333	8277	15747
54	1	19.3333	0	1	3	6	3	631.89	682.23	1	0.72	0.666667	13966.5	27334.4
55	0	21.5	0	1	7	10	9	403.28	517	1	1	0.666667	20424.9	25890.8
56	1	28.25	0	1	9	9	7	434.5	518.27	1	0.83	0.666667	11062.8	15275.2
57	0	20.3333	0	1	11	7	5	448.73	542.94	0.83	0.94	0.75	15288.1	19678.1
58	1	28.5	0	1	4	8	7	368.89	406.88	1	0.94	0.166667	31830.5	56455.5
59	1	21.25	0	1	5	9	5	496.5	498.47	1	0.83	0.25	18567.3	28321.3
60	0	27.6667	0	1	3	11	6	459.24	551.87	0.94	0.83	0.25	32424	44371.3
61	1	26	0	1	3	8	8	531.59	588.63	0.94	0.89	0.666667	22638.5	31823.4
62	1	21.25	0	1	3	6	5	572	563.13	0.94	0.83	0.666667	28178.9	42607.8
63	0	24.6667	0	1	6	6	5	421.28	487.12	1	0.94	0.333333	16807.5	38553.8
64	0	29.0833	0	1	6	13	9	409.83	475.12	1	0.94	0.583333	12016	19870
65	1	27.6667	0	1	3	7	6	512.17	546.67	1	0.83	0.5	17202	25148.8
21	0	21.1667	1	0	11	13	12	338	410.833	1	1	0.916667	12757.2	16415.8
29	1	24.3333	1	0	12	9	9	446.412	443.25	0.944444	0.888889	0.5	10927.5	13976.8
30	1	27.5833	1	0	12	9	6	314.944	374.059	1	0.944444	0.916667	17245.1	20814.3
31	1	18.25	1	0	8	8	5	429.056	490.706	1	0.944444	0.666667	14721.2	22245.5
32	1	29.25	1	0	11	12	4	390.867	450.778	0.833333	1	0.833333	13106	17396.1
33	1	28.9167	1	0	11	8	7	430.444	470.941	1	0.944444	0.75	6308.22	10408.6
34	1	26.75	1	0	9	10	8	387.056	499	1	0.944444	0.916667	11738.8	15267.5
22	0	27.0833	1	0	7	12	8	456.333	451.933	0.833333	0.833333	0.666667	8337.38	12220.5
35	1	25.0833	1	0	10	8	4	330.056	415.294	1	0.944444	0.666667	12699.6	17988.8
36	1	25	1	0	12	10	6	437.944	502.765	1	0.944444	0.833333	13797.7	20493.4
45	1	27	1	0	12	13	11	402	413	1	0.83	0.666667	27467.5	31327.5
37	1	25.8333	1	0	10	13	7	352.056	430.389	1	1	0.666667	15787.6	20003.6
38	1	27.4167	1	0	10	9	5	525.944	574.647	1	0.944444	0.75	14484.8	19147.1
23	0	24.0833	1	0	12	8	6	555.056	572.333	1	1	1	26105.3	32672.1
39	1	20.1667	1	0	11	10	8	444.5	518.647	1	0.944444	0.833333	7446.7	11553.1
24	0	24	1	0	0	10	6	360.167	453.429	1	0.777778	0.666667	9629.25	13579.1
25	0	18.6667	1	0	11	11	8	359.889	427.562	1	0.888889	0.916667	15060.9	20576.8
40	1	23	1	0	9	14	7	340.824	378.667	0.944444	0.833333	0.583333	5209.86	9335.43
41	1	21	1	0	10	8	5	421.471	425.188	0.944444	0.888889	0.833333	8194	11417.2
26	0	20.5833	1	0	10	10	4	620	595.294	0.833333	0.944444	0.833333	17970.6	22361.8
27	0	28.3333	1	0	12	15	11	349	360.412	1	0.944444	0.916667	12509.5	15608.3
42	1	19.5	1	0	9	12	5	399.941	408.588	0.944444	0.944444	0.833333	15369.9	20041.1
43	1	23.4167	1	0	7	16	11	382.389	424.909	1	0.611111	0.5	11812.7	15082.8
44	1	20.5	1	0	10	9	9	349.444	396.312	1	0.888889	0.75	18981.3	21737.6
28	0	28.6667	1	0	11	13	11	373.778	418.125	1	0.888889	0.916667	17648.3	20250.6
76	1	23.8333	1	1	9	9	7	351.706	406.188	0.944444	0.888889	0.416667	13952.6	17581
77	1	20	1	1	7	12	10	335.778	410.176	1	0.944444	0.75	12053.8	15662.4
66	0	29.9167	1	1	12	8	6	397.444	485.941	1	0.944444	0.916667	26535	32438.1
67	0	23.8333	1	1	12	8	9	441.167	493	1	0.944444	0.666667	5374.38	8716
78	1	19.6667	1	1	11	8	5	440.471	463.867	0.944444	0.833333	1	19957.9	23072.5
79	1	23	1	1	8	10	6	386.412	442.722	0.944444	1	0.833333	13550.7	17581.1
80	1	19.8333	1	1	11	12	8	375.056	428.188	1	0.888889	1	21450	27798.1
68	0	19.8333	1	1	11	13	10	435.778	455.333	1	1	1	9459.08	12577.2
81	1	22.25	1	1	11	11	7	505.111	550.389	1	1	0.666667	18086.1	22558.8
69	0	18.3333	1	1	8	9	4	455.389	548.471	1	0.944444	0.583333	23705.1	32126.4
70	0	29.3333	1	1	12	9	6	429.333	406.938	1	0.888889	0.75	16365.8	19640.3
71	0	27.3333	1	1	9	11	9	584.824	552.294	0.944444	0.944444	0.833333	26057.3	32209.5
82	1	25.6667	1	1	12	13	11	381.778	383.133	1	0.833333	0.5	11319.7	15525.5
72	0	26.25	1	1	11	10	6	430.412	467.562	0.944444	0.888889	1	16990.1	20027.6
83	1	28.5833	1	1	10	8	5	441.529	498.333	0.944444	1	0.75	15441.3	20051.8
84	1	26	1	1	8	9	8	540	567.75	0.888889	0.222222	0.416667	21802.2	29415.4
85	1	22.5833	1	1	11	8	9	502.667	596.944	1	1	0.666667	58821.6	71006.9
86	1	24.6667	1	1	9	11	10	426.444	417.312	1	0.888889	0.583333	12876.7	16228.4
87	1	22	1	1	7	14	10	318.25	418.231	0.888889	0.722222	0.583333	66622.9	71433
73	0	22.75	1	1	12	14	13	419.294	447.389	0.944444	1	0.75	11591.6	14140.3
88	1	29.5	1	1	12	11	10	337.111	378.824	1	0.944444	1	14610.6	17533.1
89	1	27.8333	1	1	11	9	11	518.778	535.412	1	0.944444	0.75	16887	22731.8
90	1	20	1	1	8	10	6	350.278	435.688	1	0.888889	0.916667	13665.5	17712.3
74	0	26.9167	1	1	6	11	5	408	470	1	1	0.583333	10505.1	18575.4
75	0	24.0833	1	1	9	12	11	393.294	479.467	0.944444	0.833333	0.833333	21892.7	25504.4
